# Supplementary material
Source: PubMed Central journal article supplement (PMC2570882)
Supplement: M804996200_1.pdf [file M804996200_1.pdf]

## SUPPLEMENTARY MATERIAL

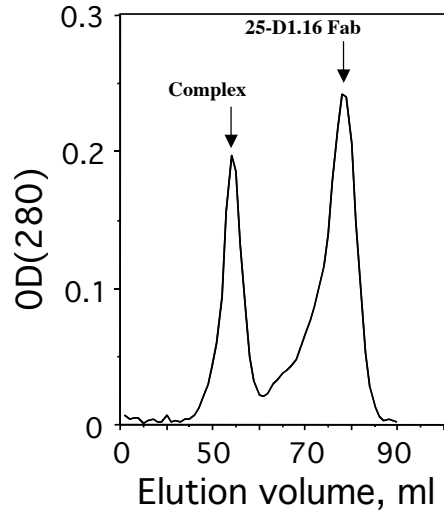

### Supplemental Figure 1. Purification of 25-D1.16-pOV8-K<sup>b</sup> complex.

312  $\mu$ l of purified 25-D1.16 Fab at 2 mg/ml was combined with 200  $\mu$ l soluble pOV8-K<sup>b</sup> complex at 1 mg/ml in 50 mM HEPES, pH7.2, containing 50 mM NaCl. The Mixture was incubated at room temperature for 1 hour and was loaded on Superose S200HR column (16x75 cm) equilibrated with the same buffer. Analysis of the chromatographic profile shown demonstrates that there was no detectable level of unbound pOV8-K<sup>b</sup> in the reaction mixture and that excess of the Fab was clearly separated from the Fab-pMHC complex. The purified complex was concentrated to 10 mg/ml by ultrafiltration.

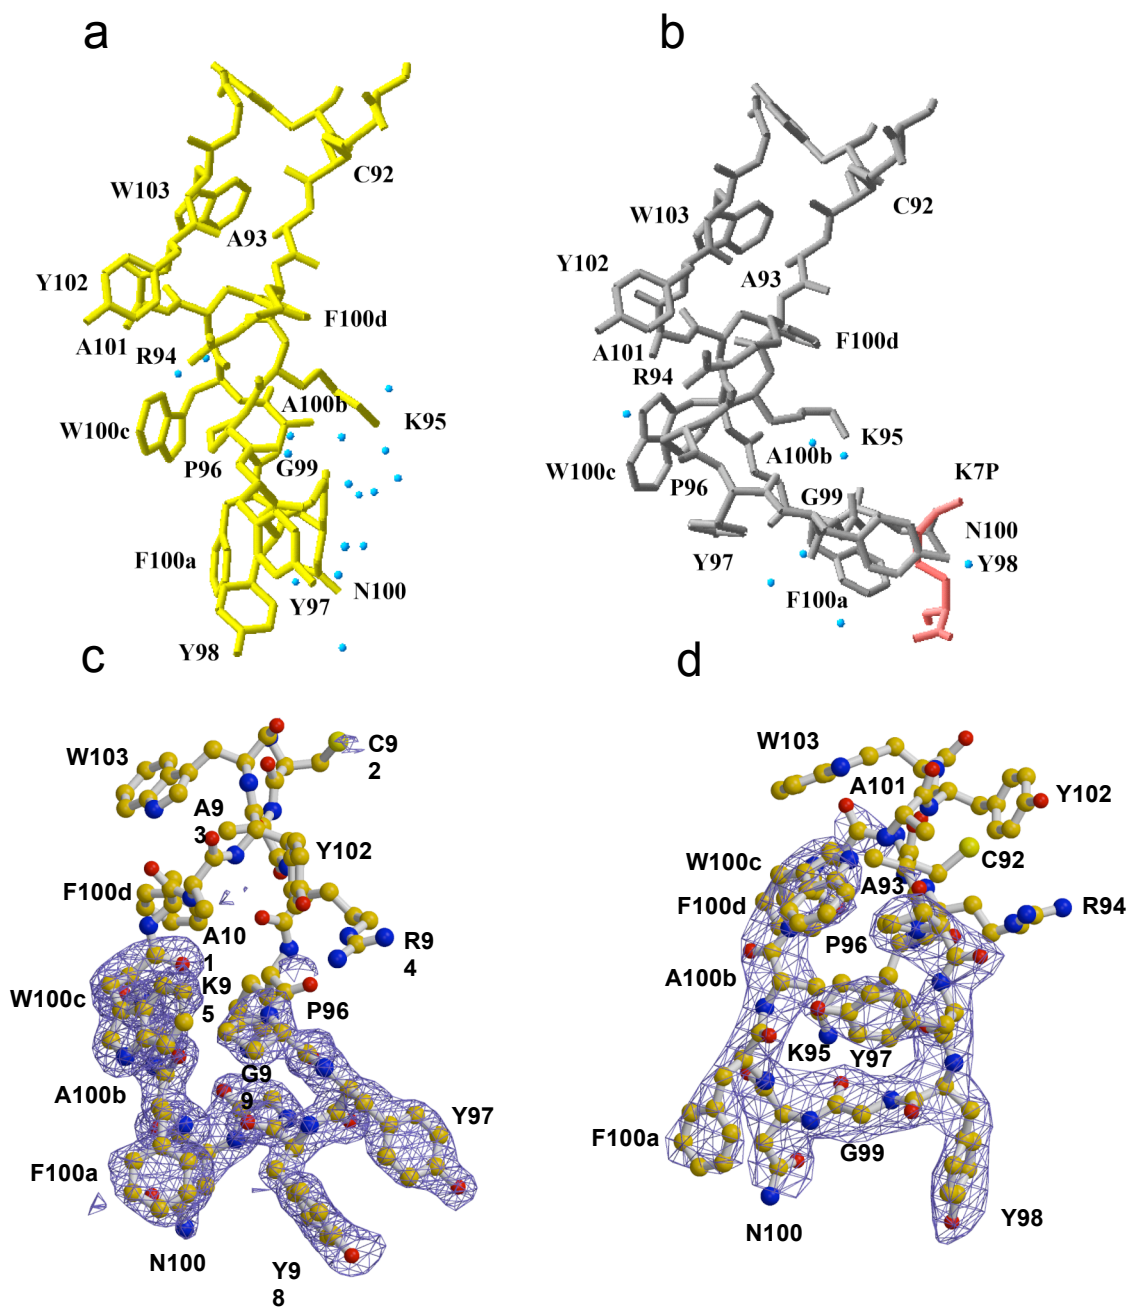

**Supplemental Figure 2. Conformational changes in CDR-H3 of 25-D1.16 induced by interactions with pOV8-K<sup>b</sup> ligand**

The CDR-H3 loop of intact 25-D1.16 Fab (a) is stabilized by 6 direct hydrogen bonds. The loop incorporates 16 water molecules (shown in blue) that form 34 water-bridged contacts within the loop, which are necessary to increase stability of the loop when it is exposed to the solvent. Upon binding of 25-D1.16 Fab to pOV8-K<sup>b</sup> protein, the CDR-H3 loop undergoes significant conformational changes, resulting in the displacement of 7 water molecules (b). TyrH97, which was exposed to the solvent in the intact 25-D1.16 molecule, swings around by 124° to form a direct hydrogen bond with the carbonyl oxygen of PheH100A. LysH95 forms a hydrogen bond with the carbonyl oxygen of GlyH99. These shifts move ProH96 to the vicinity of TrpH100C, resulting in the formation of multiple van der Waals' interactions. Two additional hydrogen bonds between ArgH97 and TyrH102 and AlaH101 are also

formed. As a result of these structural rearrangements, the CDRH3 loop is compacted, which then allows for the CDR1 and CDR2 loops of the Fab to reach K<sup>b</sup> helices. Side chains of TyrH98, GlyH99 and AsnH100 wrap around the side chain of the LysP7 (pink). Simulated annealing omit  $F_o-F_c$  electron density map around CDR-H3 of intact (c) and bound (d) 25-D1.16 Fab contoured at 3.0 sigma. Residues TyrH97-AlaH100B were omitted in the simulated annealing omit calculation. Residues CysH92-TrpH103 are shown in ball-and-stick diagram. Electron density for omitted residues is unambiguous.

**Supplemental Table 1. Contacts between 25-D1.16 and pOV8 peptide**

| 25-D1.16 element              | 25-D1.16 contact atom | Peptide contact atom | Distance, Å          | Type of interaction <sup>1)</sup> |
|-------------------------------|-----------------------|----------------------|----------------------|-----------------------------------|
| <b>Direct contacts</b>        |                       |                      |                      |                                   |
| CDR-H1                        | AsnH33 ND2            | LysP7 NZ             | 3.03                 | HB                                |
| CDR-H2                        | AspH50 OD2            | LysP7 NZ             | 3.94                 | SB                                |
| CDR-H3                        | TyrH98 OH             | LeuP8 O              | 2.94                 | HB                                |
|                               | TyrH98 CZ             | LysP7 CD             | 3.49                 | VDW                               |
|                               | GlyH99 N              | LysP7 CD             | 3.83                 | VDW                               |
|                               | AsnH100 ND2           | PheP5 O              | 3.26                 | HB                                |
|                               | AsnH100 N             | GluP6 OE1            | 2.94                 | HB                                |
|                               | AsnH100 OD1           | LysP7 CE             | 2.95                 | VDW                               |
|                               | PheH100A CZ           | AsnP4 O              | 3.29                 | VDW                               |
|                               | PheH100A CZ           | PheP5 O              | 3.20                 | VDW                               |
|                               | PheH100A CE2          | GluP6 N              | 3.97                 | VDW                               |
| CDR-L3                        | SerL93 OG             | AsnP4 ND2            | 3.82                 | HB                                |
|                               | ThrL94 N              | AsnP4 ND2            | 3.67                 | HB                                |
| <b>Water-bridged contacts</b> |                       |                      |                      |                                   |
| 25-D1.16 element              | 25-D1.16 contact atom | Water molecule       | Peptide contact atom | Distance, Å                       |
| CDR-H3                        | TyrH98 O              | Wat 336              | GluP6 OE2            | 3.22/3.24                         |
|                               | PheH100A O            | Wat 184              | GluP6 OE2            | 2.72/3.14                         |
|                               | PheH100A N            | Wat 184              | GluP6 OE2            | 2.77/3.14                         |
|                               | AsnH100 N             | Wat 184              | GluP6 OE2            | 3.24/3.14                         |

<sup>1)</sup>HB, hydrogen bond; SB, salt bridge; VDW, van der Waals' interaction.

**Supplemental Table 2. Contacts between 25-D1.16 and K<sup>b</sup> heavy chain**

| 25-D1.16 element       | 25-D1.16 contact atom                   | K <sup>b</sup> element | K <sup>b</sup> contact atom                                      | Distance, Å            | Type of interaction <sup>1)</sup> |
|------------------------|-----------------------------------------|------------------------|------------------------------------------------------------------|------------------------|-----------------------------------|
| Direct contacts        |                                         |                        |                                                                  |                        |                                   |
| CDR-H2                 | AsnH54 OD1                              | $\alpha$ 1 helix       | ValB76 CG1                                                       | 3.53                   | VDW                               |
|                        | AsnH54 O                                | $\alpha$ 1 helix       | ArgB79 NH1                                                       | 2.67                   | HB                                |
|                        | AsnH54 ND2                              | $\alpha$ 1 helix       | ThrB80 OG1                                                       | 3.50                   | HB                                |
|                        | GlyH56 N                                | $\alpha$ 1 helix       | ArgB79 NH1                                                       | 3.76                   | HB                                |
|                        | ThrH57 N                                | $\alpha$ 1 helix       | ValB76 CG2                                                       | 3.83                   | VDW                               |
|                        | TyrH59 N                                | $\alpha$ 1 helix       | GlnB72 NE2                                                       | 2.69                   | HB                                |
|                        | GlnH61 CG                               | $\alpha$ 1 helix       | GlnB65 OE1                                                       | 3.15                   | VDW                               |
|                        | CDR-H3                                  | TyrH97 CD2             | $\alpha$ 2 helix                                                 | GlnB149 O              | 3.91                              |
| TyrH97 OH              |                                         | $\alpha$ 2 helix       | AlaB150 O                                                        | 3.93                   | HB                                |
| TyrH97 CE1             |                                         | $\alpha$ 2 helix       | AlaB150 CB                                                       | 3.38                   | VDW                               |
| TyrH97 CD1             |                                         | $\alpha$ 2 helix       | AlaB150 CB                                                       | 3.47                   | VDW                               |
| TyrH98 CD2             |                                         | $\alpha$ 2 helix       | LysB146 CD                                                       | 3.35                   | VDW                               |
| AsnH100 ND2            |                                         | $\alpha$ 1 helix       | SerB73 OG                                                        | 3.17                   | HB                                |
| PheH100A CE2           |                                         | $\alpha$ 2 helix       | ArgB155 CZ                                                       | 3.36                   | VDW                               |
| CDR-L1                 |                                         | TyrL30 CE1             | $\alpha$ 2 helix                                                 | AlaB158 O              | 3.65                              |
|                        | TyrL30 OH                               | $\alpha$ 2 helix       | ThrB163 N                                                        | 3.33                   | HB                                |
|                        | ArgL32 NH2                              | $\alpha$ 2 helix       | GluB154 O                                                        | 3.63                   | HB                                |
|                        | ArgL32 NH2                              | $\alpha$ 2 helix       | ArgB155 N                                                        | 3.54                   | HB                                |
|                        | GluL27 OE1                              | $\alpha$ 1 helix       | ArgB62 NH1                                                       | 2.84                   | SB                                |
| CDR-L3                 | TrpL92 CZ2                              | $\alpha$ 2 helix       | ThrB163 OG1                                                      | 3.89                   | VDW                               |
|                        | TrpL92 CZ3                              | $\alpha$ 2 helix       | ArgB155 CG                                                       | 3.87                   | VDW                               |
|                        | TrpL92 CZ3                              | $\alpha$ 2 helix       | AlaB158 CB                                                       | 3.80                   | VDW                               |
|                        | TrpL92 CH2                              | $\alpha$ 2 helix       | AlaB158 CB                                                       | 3.54                   | VDW                               |
| Water-bridged contacts |                                         |                        |                                                                  |                        |                                   |
| 25-D1.16 element       | 25-D1.16 contact atom                   | Water molecule         | K <sup>b</sup> contact atom                                      | Distance, Å            |                                   |
| CDR-H2                 | AsnH52 OD1,<br>AsnH53 ND2,<br>TyrH98 OH | Wat 204                | ThrB80 CG2 ( $\alpha$ 1 helix)<br>LysB146 NZ ( $\alpha$ 2 helix) | 3.3, 3.6, 3.3/3.1, 3.3 |                                   |
|                        | ThrH57 O                                | Wat 142                | GlnB72 O ( $\alpha$ 1 helix)                                     | 2.8/2.86               |                                   |
|                        | ThrH57 OG1,<br>GlnH61 NE2               | Wat 30                 | GlnB72 NE2 ( $\alpha$ 1 helix)                                   | 3.0/3.3                |                                   |
| CDR-H3                 | TyrH98 O,<br>TyrH98 N                   | Wat 267                | GlyB69 N,<br>GlnB72 OE1 ( $\alpha$ 1 helix)                      | 2.7/3.0, 2.7           |                                   |
|                        | TyrH98 O,<br>TyrH98 N                   | Wat 104                | LysB146 O,<br>( $\alpha$ 2 helix)                                | 2.75, 3.3/ 3.0         |                                   |
| CDR-L1                 | AspL28 OD1                              | Wat 327                | GluB166 OE1,<br>GluB166 OE2<br>( $\alpha$ 2 helix)               | 2.63/2.7, 2.8          |                                   |
|                        | TyrL30 CE1                              | Wat 129                | Glu166 OE1<br>( $\alpha$ 2 helix)                                | 3.3/3.1                |                                   |
| CDR-L3                 | TrpL92 O                                | Wat 178                | Arg155 NH1<br>( $\alpha$ 2 helix)                                | 2.7/2.8                |                                   |

<sup>1)</sup>see Supplemental Table 1.
